# Supplementary material for: Diversity of Arbuscular Mycorrhizal Fungi in Distinct Ecosystems of the North Caucasus, a Temperate Biodiversity Hotspot
Source: Preprints.org preprint supplement (doi:10.20944/preprints202312.0811.v1), 2023-12-12
Supplement: Supplementary file 1 [file supplementary]

## Sheet: Table S1
	Table S1. Soil characteristics for analyzed stationary trial plots in the sampling horizon 0-10 cm
	STP number	Stationary trial plot	pHKCl	Pi, mg/kg	Ntotal, %	Ptotal, %	Sum of fractions <0.01mm	Soil type by mechanical composition
	1	Subalpine Meadow-4, Malaya Hatipara ridge	5.87b	9.7d	0.64a	0.08ab	47.2a	highly decomposed peat
	3	Subalpine Meadow-3, Malaya Hatipara ridge	5.65b	12.3d	0.70a	0.12a	45.6a	highly decomposed peat
	4	Subalpine Meadow-2, Malaya Hatipara ridge	5.59b	9.2d	0.54ab	0.08ab	34.9b	medium loam
	7	Fir Forest-3, Malaya Hatipara mountain	3.82d	7.2d	0.30c	0.04c	22.2c	light loam
	8	Pine Forest-3, Malaya Hatipara mountain	3.92d	2023-07-17	0.45b	0.06b	40.6ab	medium loam
	9	Mixed forest near the Bolshaya Hatipara river, Bolshaya Hatipara mountain	4.45c	54.5b	0.67a	0.11a	17.2c	heavy sandy loam
	11	Grassland in the valley of the Teberda river, Teberda town	6.84a	133.5a	0.35c	0.10a	15.9c	heavy sandy loam
	12	Grassland in the valley of the Teberda river, the border of the New Teberda village	6.47a	31.1c	0.20d	0.04c	45.7a	heavy loam
	13	Grassland in the valley of the Kuban river, Ordzhonikidzevsky village	6.76a	18.3cd	0.18d	0.07b	18.1c	heavy sandy loam
	Note: Pi – inorganic phosphorus available for plant nutrition. Different letters (“a”, “b”, etc.) indicate significant differences within the same parameters (ANOVA and Tukey’s test; P < 0.05).

## Sheet: Table S2
	Table S2. Characteristics of stationary trial plots and plant communities
	STP number	Stationary trial (sample) plot	The characteristics of stationary trial plot	List of plant species	Number of herbaceous plant species	Percent of annual plants
	1	Subalpine Meadow-4, Malaya Hatipara ridge	Low-grass rocky subalpine meadow (the trial area – 10 m x 10 m) is located on the slope of a small mountain ridge, the high-altitude ecological profile in the Teberdinsky National Park. There are single Koch pine trees, rock outcrops occasionally. The surface of the soil is smooth, slightly sod-covered, there are many stones covered with lichens (from cobblestones to rubble). There are a lot of d…	Dominant species: cereals (Agrostis capillaris, Bromopsis variegata, Elymus sp., Festuca rupicola). Subdominant species: Allium pseudostrictum. Other species: Achillea millefolium, Anthemis caucasica, Anthemis macroglossa, Campanula sp., Carduus adpressus, Chamaenerion angustifolium, Cotoneaster integerrimus, Dianthus ruprechtii, Gypsophila sp., Hieracium sp., Hypericum sp., Juniperus communis sb…	27	0.14
	3	Subalpine Meadow-3, Malaya Hatipara ridge	Subalpine Meadow-3, rocky high-grass cereal-mixed meadow (the trial area – 10 m x 10 m) is located on the slope of Malaya Hatipara ridge, the high-altitude ecological profile in the Teberdinsky National Park. There are cushions forming mosses and epilithic lichens on rocky ledges. The slope of the surface is 25-30° (very steep slope) with south-eastern exposure. Soil surface is moderately moist. …	Dominant species: cereals (Festuca sp., Agrostis planifolia). Subdominant species: umbellifers (Heracleum sp., Laserpitium stevenii, Bupleurum polyphyllum). Other species: Achillea millefolium, Achillea nobilis, Aconitum confertiflorum, Alchemilla minusculiflora, Anthemis caucasica, Anthemis macroglossa, Anthyllis vulneraria, Astrantia maxima, Briza elatior, Carduus adpressus, Cephalaria gigantea…	50	0.1
	4	Subalpine Meadow-2, Malaya Hatipara ridge	Subalpine Meadow-2, high-grass mixed-grass meadow (the trial area – 10 m x 10 m) is located on the slope of Malaya Hatipara ridge, the high-altitude ecological profile in the Teberdinsky National Park. Sparse trees areas with a predominance of pine are above and below the slope. Soil surface is sod-covered, hummocky. The slope of the surface is 20° (very steep slope) with south-eastern exposure. …	Dominant species: umbellifers (Agasyllis latifolia, Angelica tatianae, Anthriscus sylvestris, Bupleurum polyphyllum, Heracleum sp., Pimpinella rhodantha, P. saxifraga). Subdominant species: Chamaenerion angustifolium, Trisetum flavescens. Other species: Achillea millefolium, Aconitum confertiflorum, A. cymbulatum, A. orientale, Agrostis capillaris, Alchemilla minusculiflora, Astragalus sp., Campa…	46	0.04
	7	Fir Forest-3, Malaya Hatipara mountain	Fir Forest-3, dead-cover moist green-moss fir forest (Abies nordmanniana; the trial area – 10 m x 10 m) is located on the slope of Malaya Hatipara ridge, the high-altitude ecological profile in the Teberdinsky National Park. The slope of the surface is 44° (very steep slope) with northern exposure. Projective coverage (PC) of the lower storey is 20%.	Herbaceous plant species: Festuca altissima, Gymnocarpium dryopteris, Oxalis acetosella, Polygonatum orientale, Polypodium vulgare, Senecio renifolius, Solidago virgaurea, Trifolium sp.,Valeriana alliariifolia.Mosses species were not determined.	9	0.1
	8	Pine Forest-3, Malaya Hatipara mountain	Pine Forest-3, pine (Pinus sylvestris) with reed grass (the trial area – 10 m x 10 m) is located on the slope of Malaya Hatipara ridge, the high-altitude ecological profile in the Teberdinsky National Park. The slope of the surface is 43° (very steep slope) with southern exposure. Soil surface is dry. PC of the lower storey is 15%.	Dominant species: Calamagrostis arundinacea, Digitalis ciliata. Other species:Asyneuma campanuloides, Campanula rapunculoides, Festuca altissima, Trifolium sp.	6	0.14
	9	Mixed forest near the Bolshaya Hatipara river, Bolshaya Hatipara mountain	The main tree storey of mixed forest is Betula pendula, Fagus orientalis, Picea orientalis, the underwood – Acer sp., Sorbus aucuparia, Corylus avellana, the young growth – Abies nordmanniana. The trial area (10 m x 10 m) is a glade in the forest, the high-altitude ecological profile in the Teberdinsky National Park. In the lower storey there are mosses in places. Forest litter is mainly represen…	Dominant species: Petasites albus. Subdominant species: Brachypodium pinnatum, Aconitum nasutum. Other species: Anthriscus sylvestris, Calamagrostis arundinacea, Calamintha grandiflora, Fragaria vesca, Galium odoratum, Geranium robertianum, Melica nutans, Mycelis muralis, Oxalis acetosella, Polygonatum verticulatum, Salvia glutinosa, Telekia speciosa, Thalictrum sp., Trifolium sp., Vicia sepium.	18	0.1
	11	Grassland in the valley of the Teberda river, Teberda town	Disturbed grassland (the trial area – 10 m x 10 m) is located in the river valley (second terrace), the Teberdinsky National Park. The soil surface is smooth with almost no slope (the surface is 2-3°, flat slope) towards the river., with stones and boulders covered with lichens. Soil surface is moderately moist. TPC – 80%.	Dominant species: Trifolium repens. Subdominant species: Setaria pumila. Other species:Achillea millefolium,Alchemilla tytthantha, Lolium perenne, Medicago falcata, M. lupulina, Plantago major, Polygonum neglectum, Rumex acetosella, Sedum pallidum, Taraxacum officinale, Trifolium campestre, Vicia sepium.	14	0.31
	12	Grassland in the valley of the Teberda river, the border of the New Teberda village	Disturbed grassland (the trial area – 10 m x 10 m) is located in the river valley (second terrace) surrounded by deciduous trees and shrubs (Corylus avellana, Crataegus monogyna, Prunus sp., Ulmus minor). The soil surface is smooth with almost no slope (the surface is 1-3°, flat slope). Soil surface is from dry to moderately moist. TPC – 80%.	Dominant species: Urtica dioica, Fragaria vesca. Subdominant species: cereals (Holcus lanatus, Bromus arvensis, Echinochloa crus-galli). Other species:Achillea millefolium, Agrimonia pilosa, Alchemilla caucasica, Arctium lappula, Carduus nutans, Cichorium intybus, Cirsium arvense, Convolvulus arvensis, Conyza canadensis, Dactylus glomerata, Daucus carota, Echium vulgare, Erigeron acris, Fragaria …	44	0.24
	13	Grassland in the valley of the Kuban river, Ordzhonikidzevsky village	Disturbed floodplain grassland (the trial area – 10 m x 10 m) is located in the river valley (second terrace), fresh ruderal meadow. Small bushes of Alnus glutinosa. The soil surface is sod-formed, bumpy without slope (the surface is 1-2°, flat slope). Soil surface is from dry to moderately moist. TPC – 100%.	Dominant species: Ambrosia artemisiifolia. Subdominant species: Setaria pumila. Other species: Achillea millefolium, Artemisia absintium, Astragalus sp., Berteroa incana, Centaurea biebersteinii, Cichorium intybus, Cirsium sp., Convolvulus arvensis, Elytrigia repens, Eurodium cicutarium, Galium humifusum, Lotus corniculatus, Medicago falcata, M. lupulina, Plantago lanceolata, Potentilla adscharic…	26	0.28

## Sheet: Table S3
	Table S3. Average and largest p-distances in ITS1 and ITS2 regions for various AMF genera with more than one species
	AMF genus	Average p-distance value		Maximum р-distance value
		ITS1	ITS2	ITS1	ITS2
	Acaulospora	0.39	0.24	0.60	0.44
	Ambispora	0.20	0.15	0.42	0.32
	Archaeospora	0.27	0.24	0.41	0.36
	Cetratospora	0.17	0.15	0.26	0.28
	Claroideoglomus	0.19	0.24	0.35	0.40
	Corymbiglomus	0.27	0.21	0.30	0.25
	Dentiscutata	0.09	0.11	0.21	0.16
	Diversispora	0.14	0.12	0.26	0.23
	Dominikia	0.27	0.18	0.46	0.29
	Entrophospora*	0.10	0.12	0.14	0.17
	Funneliformis	0.17	0.12	0.42	0.23
	Gigaspora	0.11	0.10	0.27	0.18
	Glomus	0.37	0.37	0.50	0.61
	Innospora*	0.01	0.01	0.01	0.01
	Kamienskia	0.32	0.30	0.37	0.39
	Oehlia*	0.26	0.23	0.38	0.31
	Paraglomus	0.30	0.24	0.36	0.30
	Pervetustus*	0.03	0.05	0.03	0.05
	Racocetra	0.14	0.11	0.28	0.18
	Redeckera	0.31	0.13	0.39	0.19
	Rhizoglomus	0.15	0.19	0.18	0.25
	Rhizophagus	0.20	0.19	0.47	0.40
	Sacculospora	0.27	0.14	0.41	0.21
	Sclerocarpum*	0.11	0.07	0.13	0.11
	Sculellospora	0.21	0.18	0.27	0.24
	Septoglomus	0.16	0.20	0.33	0.36
	Note: *genus with one species (monotypic genus).

## Sheet: Table S4
	Table S4. Identification of arbuscular mycorrhizal fungi: species list according to OTUs founded by ITS1 analysis
	Number of OTUs for ITS1	OTUs for meadow biotopes			OTUs for forest biotopes			OTUs for river valley (grassland, disturbed area) biotopes			Total	Total OTUs for			Total % of OTUs for			Total %
	Species list for ITS1	STP #1	STP #3	STP #4	STP #7	STP #8	STP #9	STP #11	STP #12	STP #13	OTUs	Meadow	Forest	Valley	Meadow	Forest	Valley	of OTUs
	Acaulospora delicata	0	0	0	0	0	0	1	0	0	1	0	0	1	0	0	0.465116	0.348432
	Diversispora slowinskiensis	0	0	0	0	0	1	0	0	0	1	0	1	0	0	1.17647	0	0.348432
	Diversispora spurca	0	0	0	0	0	1	0	0	0	1	0	1	0	0	1.17647	0	0.348432
	Diversispora varaderana	0	0	0	0	0	0	0	0	1	1	0	0	1	0	0	0.465116	0.348432
	Dominikia achra	0	0	0	0	0	0	1	0	0	1	0	0	1	0	0	0.465116	0.348432
	Halonatospora pansihalos	0	0	0	0	0	0	0	0	1	1	0	0	1	0	0	0.465116	0.348432
	Acaulospora punctata	0	0	1	0	0	1	0	0	0	1	1	1	0	0.900901	1.17647	0	0.348432
	Acaulospora viridis	0	0	1	0	0	0	0	0	0	1	1	0	0	0.900901	0	0	0.348432
	Archaeospora europaea	0	1	0	0	0	0	1	0	0	1	1	0	1	0.900901	0	0.465116	0.348432
	Archaeospora trappei	1	1	0	0	0	0	1	0	0	1	1	0	1	0.900901	0	0.465116	0.348432
	Paraglomus brasilianum	0	0	1	0	0	0	0	0	0	1	1	0	0	0.900901	0	0	0.348432
	Ambispora fennica	0	0	0	0	1	0	2	0	0	2	0	1	2	0	1.17647	0.930233	0.696864
	Claroideoglomus lamellosum	0	0	0	0	0	0	2	0	0	2	0	0	2	0	0	0.930233	0.696864
	Diversispora celata	0	0	0	0	0	0	0	1	1	2	0	0	1	0	0	0.465116	0.696864
	Diversispora sporocarpia	0	0	0	0	0	2	0	0	0	2	0	2	0	0	2.35294	0	0.696864
	Palaeospora spainii	0	0	0	0	0	0	2	0	0	2	0	0	2	0	0	0.930233	0.696864
	Ambispora gerdemannii	1	0	0	0	1	0	0	0	2	2	1	2	2	0.900901	2.35294	0.930233	0.696864
	Diversispora insculpta	1	1	0	1	0	0	0	0	0	2	1	1	0	0.900901	1.17647	0	0.696864
	Acaulospora nivalis	0	0	2	0	1	0	0	0	0	2	2	1	0	1.8018	1.17647	0	0.696864
	Septoglomus viscosum	0	0	0	0	0	0	0	0	3	3	0	0	3	0	0	1.39535	1.0453
	Ambispora leptoticha	0	0	1	0	0	3	0	0	0	3	1	3	0	0.900901	3.52941	0	1.0453
	Glomus macrocarpum	1	1	1	0	0	1	2	0	0	3	1	1	2	0.900901	1.17647	0.930233	1.0453
	Septoglomus nigrum	1	0	1	0	0	3	2	2	0	3	1	3	3	0.900901	3.52941	1.39535	1.0453
	Otospora bareae	1	1	0	0	0	1	1	0	2	3	2	1	3	1.8018	1.17647	1.39535	1.0453
	Acaulospora alpina	0	0	3	0	0	0	0	0	0	3	3	0	0	2.7027	0	0	1.0453
	Claroideoglomus walkeri	1	0	0	0	0	0	5	0	2	6	1	0	6	0.900901	0	2.7907	2.09059
	Dominikia disticha	1	0	0	0	0	0	6	0	0	6	1	0	6	0.900901	0	2.7907	2.09059
	Rhizoglomus invermaium	0	0	0	0	1	0	4	0	4	7	0	1	6	0	1.17647	2.7907	2.43902
	Funneliformis mosseae	0	0	0	0	0	0	8	0	0	8	0	0	8	0	0	3.72093	2.78746
	Septoglomus constrictum	2	0	1	0	4	2	3	3	4	8	2	5	7	1.8018	5.88235	3.25581	2.78746
	Acaulospora paulinae	1	0	0	0	1	6	7	0	0	9	1	6	7	0.900901	7.05882	3.25581	3.13589
	Glomus indicum	6	0	1	0	0	0	7	5	7	12	6	1	10	5.40541	1.17647	4.65116	4.18118
	Glomus tetrastratosum	5	2	3	2	0	0	3	0	0	12	8	2	3	7.20721	2.35294	1.39535	4.18118
	Claroideoglomus claroideum	3	8	1	0	0	1	7	1	2	12	9	1	8	8.10811	1.17647	3.72093	4.18118
	Rhizophagus irregularis	3	3	4	1	1	9	8	4	10	17	6	9	15	5.40541	10.5882	6.97674	5.92334
	Paraglomus laccatum	2	0	3	2	0	6	19	3	6	22	4	8	19	3.6036	9.41176	8.83721	7.66551
	Rhizophagus intraradices	10	7	5	3	3	9	15	3	8	24	10	13	21	9.00901	15.2941	9.76744	8.36237
	Dominikia bernensis	8	1	3	1	1	1	13	4	5	26	11	3	19	9.90991	3.52941	8.83721	9.05923
	VT03 Archaeospora sp.	1	0	0	0	0	0	0	0	0	1	1	0	0	0.900901	0	0	0.348432
	VT01 Acaulospora sp.	1	0	2	0	0	0	0	0	0	2	2	0	0	1.8018	0	0	0.696864
	VT02 Acaulospora sp.	0	0	2	0	0	0	2	0	0	2	2	1	2	1.8018	1.17647	0.930233	0.696864
	VT04 Archaeospora sp.	0	1	0	0	0	0	1	0	0	2	1	0	1	0.900901	0	0.465116	0.696864
	VT06 Archaeospora sp.	0	0	0	0	0	0	2	0	0	2	0	0	2	0	0	0.930233	0.696864
	VT07 Diversispora sp.	0	0	0	0	0	0	2	0	0	2	0	0	2	0	0	0.930233	0.696864
	VT09 Diversispora sp.	0	0	0	0	0	0	2	0	0	2	0	0	2	0	0	0.930233	0.696864
	VT10 Scutellospora sp.	0	0	1	0	0	1	1	1	0	2	1	1	1	0.900901	1.17647	0.465116	0.696864
	VT12 Rhizophagus sp.	0	0	0	0	1	0	0	1	2	2	0	1	2	0	1.17647	0.930233	0.696864
	VT14 Rhizophagus sp.	2	0	0	0	0	0	0	0	0	2	2	0	0	1.8018	0	0	0.696864
	VT17 Rhizophagus sp.	1	0	1	0	0	0	0	0	1	2	2	0	1	1.8018	0	0.465116	0.696864
	VT18 Dominikia sp.	0	0	0	0	0	0	0	2	0	2	0	0	2	0	0	0.930233	0.696864
	VT19 Claroideoglomus sp.	2	2	0	0	0	0	1	0	0	2	2	0	1	1.8018	0	0.465116	0.696864
	VT23 Rhizophagus sp.	1	0	1	0	1	2	2	1	1	2	1	2	2	0.900901	2.35294	0.930233	0.696864
	VT24 Rhizophagus sp.	1	0	1	0	0	1	1	1	0	2	1	1	2	0.900901	1.17647	0.930233	0.696864
	VT25 Rhizophagus sp.	1	1	1	1	1	2	2	0	0	2	1	2	2	0.900901	2.35294	0.930233	0.696864
	VT05 Archaeospora sp.	0	0	1	0	0	1	2	0	0	3	1	1	2	0.900901	1.17647	0.930233	1.0453
	VT08 Diversispora sp.	0	0	0	0	1	0	1	0	3	3	0	1	3	0	1.17647	1.39535	1.0453
	VT11 Rhizophagus sp.	0	0	0	0	0	0	1	1	3	3	0	0	3	0	0	1.39535	1.0453
	VT13 Rhizophagus sp.	2	1	2	1	0	0	1	0	1	3	2	1	2	1.8018	1.17647	0.930233	1.0453
	VT20 Dominikia sp.	0	0	2	0	0	0	2	0	0	3	2	0	2	1.8018	0	0.930233	1.0453
	VT21 Septoglomus sp.	0	0	0	0	0	0	0	0	3	3	0	0	3	0	0	1.39535	1.0453
	VT26 Glomus sp.	2	1	3	0	0	0	2	0	0	3	3	0	2	2.7027	0	0.930233	1.0453
	VT15 Rhizophagus sp.	3	1	4	3	0	0	1	0	0	4	4	3	1	3.6036	3.52941	0.465116	1.39373
	VT16 Rhizophagus sp.	4	3	1	0	1	1	0	0	1	4	4	3	1	3.6036	3.52941	0.465116	1.39373
	VT22 Rhizophagus sp.	1	0	0	0	0	0	4	1	0	5	2	0	5	1.8018	0	2.32558	1.74216
	VT27 Dominikia sp.	0	0	1	0	1	0	0	4	8	8	1	1	8	0.900901	1.17647	3.72093	2.78746
	Total OTUs:	70	36	55	15	20	55	150	38	81	287	111	85	215
	Note: the species with total rate of OTUs >1% are highlighted in bold.

## Sheet: Table S5
	Table S5. Identification of arbuscular mycorrhizal fungi: genera list according to OTUs founded by ITS1 analysis
	Number of OTUs for ITS1	OTUs for meadow biotopes			OTUs for forest biotopes			OTUs for river valley (grassland, disturbed area) biotopes			Total	Total OTUs for			Total % of OTUs for			Total %
	Species list for ITS1	STP #1	STP #3	STP #4	STP #7	STP #8	STP #9	STP #11	STP #12	STP #13	OTUs	Meadow	Forest	Valley	Meadow	Forest	Valley	of OTUs
	Rhizophagus	29	16	20	9	9	24	39	12	31	79	35	36	63	31.5315	42.3529	29.3023	27.5261
	Dominikia	9	1	6	1	2	1	22	10	13	46	15	4	38	13.5135	4.70588	17.6744	16.0279
	Glomus	14	4	8	2	0	1	14	5	7	30	18	4	17	16.2162	4.70588	7.90698	10.453
	Paraglomus	2	0	4	2	0	6	19	3	6	23	5	8	19	4.5045	9.41176	8.83721	8.01394
	Claroideoglomus	6	10	1	0	0	1	15	1	4	22	12	1	17	10.8108	1.17647	7.90698	7.66551
	Acaulospora	2	0	11	0	2	7	10	0	0	21	12	9	10	10.8108	10.5882	4.65116	7.31707
	Septoglomus	3	0	2	0	4	5	5	5	10	17	3	8	16	2.7027	9.41176	7.44186	5.92334
	Diversispora	1	1	0	1	1	4	5	1	5	16	1	6	9	0.900901	7.05882	4.18605	5.57491
	Archaeospora	2	3	1	0	0	1	7	0	0	10	5	1	7	4.5045	1.17647	3.25581	3.48432
	Funneliformis	0	0	0	0	0	0	8	0	0	8	0	0	8	0	0	3.72093	2.78746
	Ambispora	1	0	1	0	2	3	2	0	2	7	2	6	4	1.8018	7.05882	1.86047	2.43902
	Otospora	1	1	0	0	0	1	1	0	2	3	2	1	3	1.8018	1.17647	1.39535	1.0453
	Scutellospora	0	0	1	0	0	1	1	1	0	2	1	1	1	0.900901	1.17647	0.465116	0.696864
	Palaeospora	0	0	0	0	0	0	2	0	0	2	0	0	2	0	0	0.930233	0.696864
	Halonatospora	0	0	0	0	0	0	0	0	1	1	0	0	1	0	0	0.465116	0.348432
	Total OTUs:	70	36	55	15	20	55	150	38	81	287	111	85	215

## Sheet: Tabla S6
	Table S6. Identification of arbuscular mycorrhizal fungi: species list according to OTUs founded by ITS2 analysis
	Number of OTUs for ITS2	OTUs for meadow biotopes			OTUs for forest biotopes			OTUs for river valley (grassland, disturbed area) biotopes			Total	Total OTUs for			Total % of OTUs for			Total %
	Species list for ITS2	STP #1	STP #3	STP #4	STP #7	STP #8	STP #9	STP #11	STP #12	STP #13	OTUs	Meadow	Forest	Valley	Meadow	Forest	Valley	of OTUs
	Acaulospora punctata	0	0	0	0	0	0	1	0	0	1	0	0	1	0	0	0.507614	0.3663
	Ambispora leptoticha	0	0	1	0	0	1	0	0	0	1	1	1	0	0.840336	1.78571	0	0.3663
	Cetraspora gilmorei	0	0	0	0	0	0	0	0	1	1	0	0	1	0	0	0.507614	0.3663
	Claroideoglomus hanlinii	0	0	0	0	0	0	0	0	1	1	0	0	1	0	0	0.507614	0.3663
	Diversispora slowinskensis	0	0	0	0	0	1	0	0	0	1	0	1	0	0	1.78571	0	0.3663
	Diversispora varaderana	1	0	0	0	0	0	0	0	0	1	1	0	0	0.840336	0	0	0.3663
	Dominikia difficilevidera	0	0	0	0	0	0	0	1	0	1	0	0	1	0	0	0.507614	0.3663
	Glomus bareae	1	0	0	0	0	0	0	0	0	1	1	0	0	0.840336	0	0	0.3663
	Glomus hoi	0	0	0	0	0	1	1	1	1	1	0	1	1	0	1.78571	0.507614	0.3663
	Halonatospora pansihalos	0	0	0	0	0	0	0	0	6	1	0	0	1	0	0	0.507614	0.3663
	Scutellospora alterata	0	0	0	0	0	6	0	0	0	1	0	1	0	0	1.78571	0	0.3663
	Scutellospora pellucida	0	0	0	0	0	0	0	1	0	1	0	0	1	0	0	0.507614	0.3663
	Acaulospora alpina	0	0	2	0	0	0	0	0	0	2	2	0	0	1.68067	0	0	0.732601
	Ambispora fennica	0	0	0	0	0	0	2	0	0	2	0	0	2	0	0	1.01523	0.732601
	Ambispora gerdemannii	1	0	0	0	0	1	0	1	1	2	1	1	1	0.840336	1.78571	0.507614	0.732601
	Archaeospora spainiae	0	0	0	0	0	0	2	0	0	2	0	0	2	0	0	1.01523	0.732601
	Glomus indicum	2	1	0	0	0	1	1	1	0	2	2	1	1	1.68067	1.78571	0.507614	0.732601
	Glomus macrocarpum	0	1	1	0	0	0	0	0	1	2	2	0	1	1.68067	0	0.507614	0.732601
	Rhizophagus aggregatus	0	0	0	0	0	0	0	1	1	2	0	0	2	0	0	1.01523	0.732601
	Rhizoglomus melanus	3	1	1	0	0	0	0	0	0	3	3	0	0	2.52101	0	0	1.0989
	Archaeospora trappei	0	3	0	0	0	0	6	0	1	6	3	0	6	2.52101	0	3.04569	2.1978
	Dominikia bernensis	3	0	0	0	0	0	5	1	4	6	3	0	6	2.52101	0	3.04569	2.1978
	Rhizophagus invermaius	8	0	0	0	0	0	11	0	71	6	1	0	5	0.840336	0	2.53807	2.1978
	Acaulospora paulinae	2	1	0	0	0	4	5	0	0	7	2	4	5	1.68067	7.14286	2.53807	2.5641
	Claroideoglomus lamellosum	8	1	0	0	0	1	29	11	13	7	2	1	7	1.68067	1.78571	3.5533	2.5641
	Entrophospora infrequens	3	4	3	0	0	2	2	5	4	7	4	2	5	3.36134	3.57143	2.53807	2.5641
	Acaulospora brasiliensis	0	0	9	0	0	0	0	0	0	9	9	0	0	7.56303	0	0	3.2967
	Claroideoglomus claroideum	4	7	8	0	0	2	4	6	2	9	8	3	6	6.72269	5.35714	3.04569	3.2967
	Funneliformis mosseae	0	0	0	0	0	0	7	2	0	9	0	0	9	0	0	4.56853	3.2967
	Paraglomus laccatum	1	1	2	0	1	2	14	4	2	15	3	2	15	2.52101	3.57143	7.61421	5.49451
	Rhizophagus irregularis	2	4	4	0	2	9	9	6	7	16	7	9	13	5.88235	16.0714	6.59898	5.86081
	Rhizophagus intraradices	7	8	6	1	3	13	12	5	13	27	14	13	20	11.7647	23.2143	10.1523	9.89011
	VT28 Archaeospora sp.	0	0	0	0	0	0	1	0	0	1	0	0	1	0	0	0.507614	0.3663
	VT29 Claroideoglomus sp.	0	0	0	0	0	0	1	1	0	1	0	0	1	0	0	0.507614	0.3663
	VT31 Glomus sp.	0	0	1	0	0	0	0	0	0	1	1	0	0	0.840336	0	0	0.3663
	VT33 Glomus sp.	1	1	1	1	0	0	0	0	0	2	2	1	0	1.68067	1.78571	0	0.732601
	VT41 Glomus sp.	1	1	2	0	0	0	1	1	0	2	2	0	1	1.68067	0	0.507614	0.732601
	VT43 Archaeospora sp.	0	0	0	0	0	0	2	0	0	2	0	0	2	0	0	1.01523	0.732601
	VT49 Scutellospora sp.	0	0	2	0	0	1	0	1	0	2	1	1	1	0.840336	1.78571	0.507614	0.732601
	VT34 Glomus sp.	0	0	0	0	0	0	0	3	0	3	0	0	3	0	0	1.52284	1.0989
	VT35 Dominikia sp.	1	0	0	0	0	0	2	0	0	3	1	0	2	0.840336	0	1.01523	1.0989
	VT39 Glomus sp.	2	1	1	0	0	0	0	0	0	3	3	0	0	2.52101	0	0	1.0989
	VT40 Dominikia sp.	3	0	2	0	0	0	0	0	0	3	3	0	0	2.52101	0	0	1.0989
	VT50 Microkamienskia sp.	1	0	0	0	0	0	0	3	1	3	1	0	3	0.840336	0	1.52284	1.0989
	VT51 Glomus sp.	0	0	1	0	0	0	0	0	3	3	1	0	3	0.840336	0	1.52284	1.0989
	VT52 Glomus sp.	0	0	0	0	0	1	0	2	0	3	0	1	2	0	1.78571	1.01523	1.0989
	VT32 Glomus sp.	0	0	0	0	0	1	0	4	0	4	0	1	4	0	1.78571	2.03046	1.4652
	VT44 Archaeospora sp.	0	0	0	0	0	0	4	0	0	4	0	0	4	0	0	2.03046	1.4652
	VT48 Claroideoglomus sp.	0	0	2	0	0	0	3	3	2	5	2	0	5	1.68067	0	2.53807	1.8315
	VT36 Dominikia sp.	0	0	0	0	0	0	0	1	6	6	0	0	6	0	0	3.04569	2.1978
	VT45 Archaeospora sp.	0	0	0	0	0	3	0	4	0	6	0	3	4	0	5.35714	2.03046	2.1978
	VT30 Dominikia sp.	6	1	3	0	0	0	0	0	0	7	7	0	0	5.88235	0	0	2.5641
	VT46 Dominikia sp.	0	0	1	0	0	0	8	0	3	8	1	0	8	0.840336	0	4.06091	2.9304
	VT37 Dominikia sp.	0	0	0	0	0	0	0	9	0	9	0	0	9	0	0	4.56853	3.2967
	VT38 Microdominikia sp.	1	0	0	0	1	0	1	8	3	9	1	1	9	0.840336	1.78571	4.56853	3.2967
	VT42 Dominikia sp.	7	6	8	0	0	0	2	1	4	13	9	0	6	7.56303	0	3.04569	4.7619
	VT47 Entrophospora sp.	11	7	8	1	3	8	10	4	2	17	15	8	10	12.605	14.2857	5.07614	6.22711
	Total OTUs:	80	49	69	3	10	58	146	91	153	273	119	56	197
	Note: the species with total rate of OTUs >1% are highlighted in bold.

## Sheet: Tabla S7
	Table S7. Identification of arbuscular mycorrhizal fungi: genera list according to OTUs founded by ITS2 analysis
	Number of OTUs for ITS2	OTUs for meadow biotopes			OTUs for forest biotopes			OTUs for river valley (grassland, disturbed area) biotopes			Total	Total OTUs for			Total % of OTUs for			Total %
	Species list for ITS2	STP #1	STP #3	STP #4	STP #7	STP #8	STP #9	STP #11	STP #12	STP #13	OTUs	Meadow	Forest	Valley	Meadow	Forest	Valley	of OTUs
	Dominikia	20	7	14	0	0	0	17	13	17	56	24	0	38	20.1681	0	19.2893	20.5128
	Rhizophagus	17	12	10	1	5	22	32	12	92	51	22	22	40	18.4874	39.2857	20.3046	18.6813
	Glomus	7	5	7	1	0	4	3	12	5	27	14	5	16	11.7647	8.92857	8.12183	9.89011
	Entrophospora	14	11	11	1	3	10	12	9	6	24	19	10	15	15.9664	17.8571	7.61421	8.79121
	Claroideoglomus	12	8	10	0	0	3	37	21	18	23	12	4	20	10.084	7.14286	10.1523	8.42491
	Archaeospora	0	3	0	0	0	3	15	4	1	21	3	3	19	2.52101	5.35714	9.64467	7.69231
	Acaulospora	2	1	11	0	0	4	6	0	0	19	13	4	6	10.9244	7.14286	3.04569	6.95971
	Paraglomus	1	1	2	0	1	2	14	4	2	15	3	2	15	2.52101	3.57143	7.61421	5.49451
	Funneliformis	0	0	0	0	0	0	7	2	0	9	0	0	9	0	0	4.56853	3.2967
	Microdominikia	1	0	0	0	1	0	1	8	3	9	1	1	9	0.840336	1.78571	4.56853	3.2967
	Ambispora	1	0	1	0	0	2	2	1	1	5	2	2	3	1.68067	3.57143	1.52284	1.8315
	Scutellospora	0	0	2	0	0	7	0	2	0	4	1	2	2	0.840336	3.57143	1.01523	1.4652
	Microkamienskia	1	0	0	0	0	0	0	3	1	3	1	0	3	0.840336	0	1.52284	1.0989
	Rhizoglomus	3	1	1	0	0	0	0	0	0	3	3	0	0	2.52101	0	0	1.0989
	Diversispora	1	0	0	0	0	1	0	0	0	2	1	1	0	0.840336	1.78571	0	0.732601
	Cetraspora	0	0	0	0	0	0	0	0	1	1	0	0	1	0	0	0.507614	0.3663
	Halonatospora	0	0	0	0	0	0	0	0	6	1	0	0	1	0	0	0.507614	0.3663
	Total OTUs:	80	49	69	3	10	58	146	91	153	273	119	56	197

## Sheet: Table S8
	Table S8. List of specific species (except VT) ranked by decreasing number of OTUs
	Region	Meadow biotopes	Forest biotopes	River valley (grassland, disturbed area) biotopes
	ITS1	Acaulospora alpina	Diversispora sporocarpia	Funneliformis mosseae
		Paraglomus brasilianum	Diversispora spurca	Septoglomus viscosum
		Acaulospora viridis	Diversispora slowinskiensis	Palaeospora spainii
				Diversispora celata
				Claroideoglomus lamellosum
				Halonatospora pansihalos
				Dominikia achra
				Diversispora varaderana
				Acaulospora delicata
	ITS2	Acaulospora brasiliensis	Scutellospora alterata	Funneliformis mosseae
		Rhizoglomus melanus		Rhizophagus aggregatus
		Acaulospora alpina		Archaeospora spainiae
		Glomus bareae		Ambispora fennica
		Diversispora varaderana		Scutellospora pellucida
				Halonatospora pansihalos
				Dominikia difficilevidera
				Claroideoglomus hanlinii
				Cetraspora gilmorei
				Acaulospora punctata

## Sheet: Table S9
	Таble S9. Observed and extrapolated values of species richness, Shannon diversity and Simpson diversity by OTUs
	Hill number	Biotope	ITS1		ITS2
			Observed	Estimated	Observed	Estimated
	Species richness (q=0)	meadow	43.0	58.0a	35.0	55.2a
		forest	34.0	42.1b	20.0	38.0a
		valley	52.0	52.7a	45.0	46.5a
	Shannon diversity (q=1)	meadow	13.1	13.4b	10.0	10.2b
		forest	13.6	14.3a	6.0	6.2c
		valley	14.2	14.2a	14.5	14.6a
	Simpson diversity (q=2)	meadow	7.1	7.1c	6.1	6.1b
		forest	8.6	8.7b	3.8	3.8c
		valley	8.9	8.9a	8.3	8.3 a
	Note: Different letters (“a”, “b”, etc.) indicate significant differences within the same parameters (ANOVA and Tukey’s test; P < 0.05).

## Sheet: Table S10
	Table S10. Linear correlation coefficients (r) between AMF biodiversity parameters, plant biodiversity parameters and agrochemical indicators of STPs
	Analyzed parameter	Parameter number	1	2	3	4	5	6	7	8	9	10	11	12	13	14	15	16	17	18	19	20	21	22	23	24	25	26	27
	The number of herbaceous plant species	1	1
	Percent of annual plants	2	-0.202372	1
	Total reads	3	0.0797999	-0.0922241	1
	Merged reads after length trim	4	-0.100874	-0.304939	0.642149	1
	Altitude, m	5	0.174932	-0.76*	0.180354	0.213583	1
	pHKCl	6	0.489891	0.68*	0.088331	-0.17017	-0.41441	1
	Pi, mg/kg	7	-0.308502	0.614634	-0.0421152	0.0475063	-0.40045	0.382676	1
	Ntotal, %	8	0.20637	-0.67*	0.105618	0.462728	0.78*	-0.309023	-0.13404	1
	Ptotal, %	9	0.225007	-0.134689	-0.192318	0.36592	0.294048	0.181012	0.363121	0.72*	1
	Sum of fractions <0.01mm	10	0.533547	-0.312446	0.397926	-0.0403694	0.531509	0.00423502	-0.534216	0.309223	-0.133577	1
	Soil type by mechanical composition	11	-0.0907341	0.561024	0.142368	0.0743045	-0.88*	0.312577	0.472509	-0.607083	-0.247016	-0.42754	1
	Glomeromycota ITS1 total reads	12	-0.154736	0.76*	-0.126062	-0.00534895	-0.466911	0.69*	0.72*	-0.339552	0.307581	-0.573025	0.307567	1
	Glomeromycota ITS1 total OTU number	13	-0.0138955	0.639989	0.0984871	0.103962	-0.318011	0.74*	0.80*	-0.111927	0.422766	-0.43529	0.294959	0.90*	1
	OTUs number for ITS1 (for total species)	14	-0.0968269	0.67*	0.0912181	0.132631	-0.329775	0.71*	0.81*	-0.123665	0.41884	-0.468316	0.292303	0.93*	0.99*	1
	OTUs number for ITS1 (species level without VT)	15	-0.168221	0.68*	0.0193508	0.107532	-0.357641	0.647523	0.87*	-0.111921	0.446698	-0.517748	0.316776	0.92*	0.98*	0.99*	1
	OTUs number for ITS1 (only VT species level)	16	0.179204	0.502816	0.338148	0.20235	-0.17417	0.80*	0.469899	-0.146188	0.248664	-0.211417	0.155204	0.80*	0.88*	0.87*	0.79*	1
	Species number for ITS1 (total)	17	0.0736666	0.404588	0.411408	0.384592	-0.0614696	0.67*	0.644359	0.0986402	0.450097	-0.231505	0.154367	0.75*	0.92*	0.91*	0.87*	0.93*	1
	Species number for ITS1 (without VT)	18	-0.0272244	0.402523	0.311351	0.424553	-0.120653	0.596618	0.68*	0.146051	0.536043	-0.369861	0.184568	0.77*	0.93*	0.93*	0.90*	0.87*	0.98*	1
	Species number for ITS1 (only VT)	19	0.181405	0.383231	0.498477	0.317732	0.00785034	0.69*	0.565942	0.0402216	0.328338	-0.0643205	0.111803	0.68*	0.86*	0.84*	0.78*	0.93*	0.97*	0.89*	1
	Glomeromycota ITS2 total reads	20	0.132645	0.81*	-0.0909735	-0.0691777	-0.68*	0.87*	0.566542	-0.441883	0.215489	-0.449126	0.523803	0.88*	0.82*	0.82*	0.80*	0.77*	0.652902	0.67*	0.590414	1
	Glomeromycota ITS2 total OTU number	21	0.344283	0.624779	0.230838	0.0253482	-0.403557	0.89*	0.67*	-0.166503	0.304099	-0.150542	0.460903	0.70*	0.88*	0.84*	0.81*	0.82*	0.82*	0.79*	0.82*	0.82*	1
	OTUs number for ITS2 (for total species)	22	0.197814	0.77*	0.0431193	-0.02062	-0.59869	0.92*	0.530532	-0.37225	0.217088	-0.338689	0.470848	0.85*	0.85*	0.84*	0.80*	0.84*	0.73*	0.74*	0.68*	0.98*	0.88*	1
	OTUs number for ITS2 (species level without VT)	23	0.0454773	0.78*	-0.0976366	-0.00317305	-0.63726	0.82*	0.539507	-0.387235	0.256788	-0.492221	0.449139	0.90*	0.82*	0.83*	0.81*	0.78*	0.67*	0.71*	0.581693	0.99*	0.76*	0.97*	1
	OTUs number for ITS2 (only VT species level)	24	0.565461	0.450402	0.436654	-0.0635106	-0.255502	0.85*	0.299859	-0.185081	0.0177144	0.239265	0.352592	0.361494	0.597387	0.533318	0.466053	0.69*	0.629484	0.526233	0.71*	0.591883	0.88*	0.70*	0.507703	1
	Species number for ITS2 (total)	25	0.536006	0.513799	0.264139	0.0150647	-0.35753	0.91*	0.396536	-0.103199	0.266017	0.0342029	0.389249	0.526265	0.72*	0.67*	0.61839	0.75*	0.71*	0.67*	0.71*	0.77*	0.94*	0.85*	0.71*	0.93*	1
	Species number for ITS2 (without VT)	26	0.404572	0.560939	0.078876	0.0435376	-0.408932	0.87*	0.452213	-0.0208333	0.439569	-0.113612	0.357347	0.609594	0.76*	0.72*	0.69*	0.70*	0.69*	0.71*	0.616643	0.83*	0.89*	0.89*	0.81*	0.78*	0.95*	1
	Species number for ITS2 (only VT)	27	0.616829	0.373383	0.455616	-0.0231473	-0.236413	0.82*	0.263882	-0.190573	0.00561076	0.214838	0.367969	0.338336	0.569894	0.500385	0.424607	0.69*	0.621731	0.508564	0.71*	0.568781	0.86*	0.67*	0.47724	0.99*	0.91*	0.73*	1
	Note: "-0.76*", "0.68*" - significant (P<0.05) r values (the presence of a positive or negative relationship, respectively).

[truncated: 1 more sheets: Table S11]
